# Supplementary material for: Low mood, not anxiety, connected with micro facial expression recognition
Source: Research Square preprint supplement (doi:10.21203/rs.3.rs-7149123/v1), 2025-08-27
Supplement: Supplementary file 1 [file 9d2fa06d1135772f84a19484.docx]

Supplementary materials

**Figure S1** Histogram of scores on trait anxiety subscale of STAI of participants belonging to low and high anxiety groups


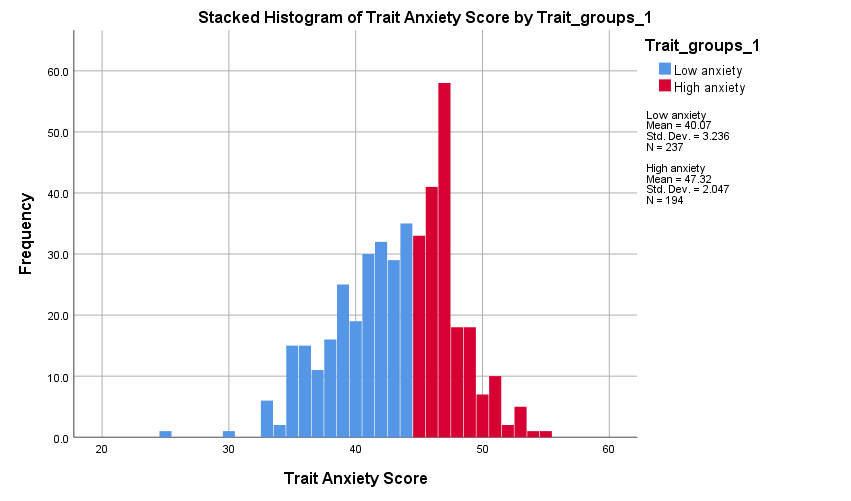


**Table S1** Demographic characteristics of low and high anxiety groups

| Variable | Low anxiety | High anxiety |
| --- | --- | --- |
| Female gender | 47.3 | 53.1 |
| Education level | |  |
| No formal education | 0.8 | 0.5 |
| O-levels | 22.4 | 13.4 |
| A-levels | 22.8 | 24.7 |
| Bachelor’s degree | 38 | 43.8 |
| Postgraduate degree | 16 | 17.5 |

**Table S2** Descriptive statistics on key study variables of low and high anxiety groups

| Variable | Low anxiety | | | | High anxiety | | | |
| --- | --- | --- | --- | --- | --- | --- | --- | --- |
| Mean | Std. dev. | Min | Max | Mean | Std. dev. | Min | Max |
| METV first correct answers | 6.69 | 2.55 | 1 | 14 | 6.68 | 2.59 | 0 | 16 |
| Angry face first correct answers | 0.21 | 0.21 | 0 | 1 | 0.22 | 0.22 | 0 | 1 |
| Trait anxiety | 40.07 | 3.24 | 25 | 44 | 47.32 | 2.03 | 45 | 55 |
| State anxiety | 43.35 | 5.01 | 30 | 58 | 46.90 | 4.17 | 36 | 62 |
| Depression (BDI-II) | 14.08 | 11.00 | 0 | 47 | 12.24 | 13.53 | 0 | 49 |

**Figure S2** Histogram of scores on BDI-II of participants belonging to low mood and control groups
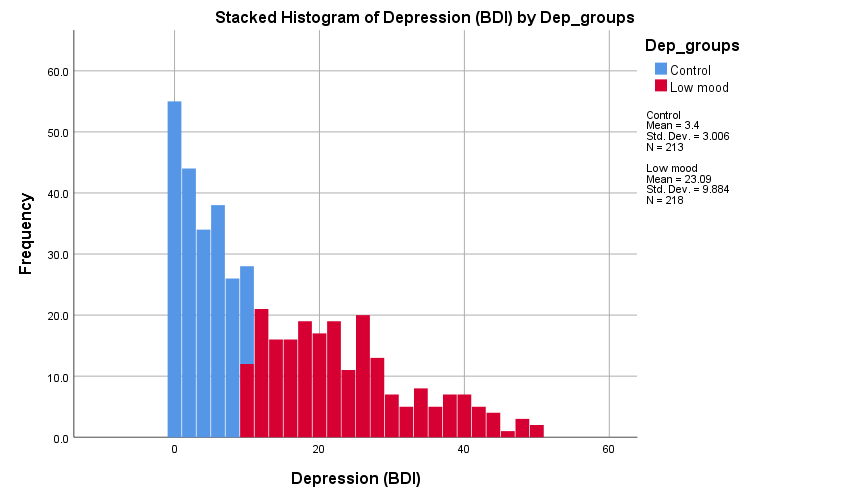


**Table S3** Demographic characteristics of low mood and control groups

| Variable | Low mood | Control |
| --- | --- | --- |
| Female gender | 52.3 | 47.4 |
| Education level | |  |
| No formal education | 1.4 |  |
| O-levels | 19.7 | 16.9 |
| A-levels | 21.1 | 26.3 |
| Bachelor’s degree | 42.7 | 38.5 |
| Postgraduate degree | 15.1 | 18.3 |

**Table S4** Descriptive statistics on key study variables of low mood and control groups

| Variable | Low mood | | | | Control | | | |
| --- | --- | --- | --- | --- | --- | --- | --- | --- |
| Mean | Std. dev. | Min | Max | Mean | Std. dev. | Min | Max |
| METV first correct answers | 7.12 | 2.38 | 1 | 16 | 6.24 | 2.67 | 0 | 14 |
| Sad face first correct answers | 0.41 | 0.26 | 0 | 1 | 0.21 | 0.21 | 0 | 1 |
| Mistaking happiness for neutrality | 0.05 | 0.21 | 0 | 1 | 0.03 | 0.17 | 0 | 1 |
| Mistaking neutrality for sadness | 0.05 | 0.22 | 0 | 1 | 0.02 | 0.14 | 0 | 1 |
| Trait anxiety | 42.83 | 5.20 | 25 | 54 | 43.86 | 3.71 | 33 | 55 |
| State anxiety | 46.18 | 5.42 | 33 | 62 | 43.75 | 4.17 | 30 | 59 |
| Depression (BDI-II) | 23.09 | 9.88 | 10 | 49 | 3.40 | 3.01 | 0 | 9 |

**Table S5** Regression models predicting first attempt METV correct answers based on depression

| Predictors | Unadjusted | | Model 1 | | Model 2 | |
| --- | --- | --- | --- | --- | --- | --- |
| *b* [95% CI] | *p* | *b* [95% CI] | *p* | *b* [95% CI] | *p* |
| Low mood group | 0.872 | <.001 | 0.498 | .057 | 0.505 | .055 |
| [0.391, 1.352] | [-0.016, 1-012] | [-0.012, 1.021] |
| Age |  |  | -0.032 | <.001 | -0.032 | <.001 |
|  |  | [-0.049, -0.015] | [-0.049, -0.015] |
| Gender |  |  | -0.141 | .562 | -0.136 | .576 |
|  |  | [-0.616, 0.335] | [-0.613, 0.341] |
| Education |  |  | 0.074 | .543 | 0.071 | .563 |
|  |  | [-0.165, 0.311] | [-0.170, 0.311] |
| High anxiety group |  |  |  |  | 0.073 | 0.767 |
|  |  |  |  | [-0.410, 0.556] |

**Table S6** Regression models predicting first attempt sad faces correct answers based on depression

| Predictors | Unadjusted | | Model 1 | | Model 2 | |
| --- | --- | --- | --- | --- | --- | --- |
| *b* [95% CI] | *p* | *b* [95% CI] | *p* | *b* [95% CI] | *p* |
| Low mood group | 0.100 | <.001 | 0.085 | .002 | 0.086 | .002 |
| [0.051, 0.149] | [0.032, 0.138] | [0.032, 0.139] |
| Age |  |  | -0.001 | .168 | -0.001 | .167 |
|  |  | [-0.003, 0.001] | [-0.003, 0.001] |
| Gender |  |  | -0.020 | .421 | -0.020 | .428 |
|  |  | [-0.069, 0.029] | [-0.069, 0.029] |
| Education |  |  | 0.008 | .513 | 0.008 | .524 |
|  |  | [-0.016, 0.033] | [-0.017, 0.033] |
| High trait anxiety group |  |  |  |  | 0.004 | .878 |
|  |  |  |  | [-0.046, 0.054] |

**Table S7** Regression models predicting mistaking happy faces for neutral based on depression

| Predictors | Unadjusted | | Model 1 | | Model 2 | |
| --- | --- | --- | --- | --- | --- | --- |
| Exp*(B)* [95% CI] | *p* | Exp*(B)* [95% CI] | *p* | Exp*(B)* [95% CI] | *p* |
| Low mood group | 0.597 | .327 | 0.546 | .283 | 0.536 | .273 |
| [0.213, 1.673] | [0.181, 1.649] | [0.176, 1.633] |
| Age |  |  | 1.007 | .703 | 1.007 | .713 |
|  |  | [0.972, 1.044] | [0.971, 1.043] |
| Gender |  |  | 0.957 | .931 | 0.956 | .929 |
|  |  | [0.351, 2.610] | [0.350, 2.607] |
| Education |  |  | 1.172 | .546 | 1.116 | .561 |
|  |  | [0.700, 1.964] | [0.695, 1.958] |
| High trait anxiety group |  |  |  |  | 0.842 | .741 |
|  |  |  |  | [0.304, 2.333] |

**Table S8** Regression models predicting mistaking neutral faces for sad based on depression

| Predictors | Unadjusted | | Model 1 | | Model 2 | |
| --- | --- | --- | --- | --- | --- | --- |
| Exp*(B)* [95% CI] | *p* | Exp*(B)* [95% CI] | *p* | Exp*(B)* [95% CI] | *p* |
| Low mood group | 0.357 | .082 | 0.256 | .031 | 0.253 | .031 |
| [0.112, 1.138] | [0.074, 0.882] | [0.073, 0.882] |
| Age |  |  | 1.029 | .123 | 1.029 | .124 |
|  |  | [0.992, 1.068] | [0.992, 1.068] |
| Gender |  |  | 1.079 | .887 | 1.081 | .885 |
|  |  | [0.379, 3.071] | [0.380, 3.076] |
| Education |  |  | 1.315 | .329 | 1.314 | .332 |
|  |  | [0.759, 2.279] | [0.757, 2.279] |
| High trait anxiety group |  |  |  |  | 0.926 | .886 |
|  |  |  |  | [0.323, 2.656] |
